# Supplementary material
Source: PubMed Central journal article supplement (PMC10782558)

# Figure S1

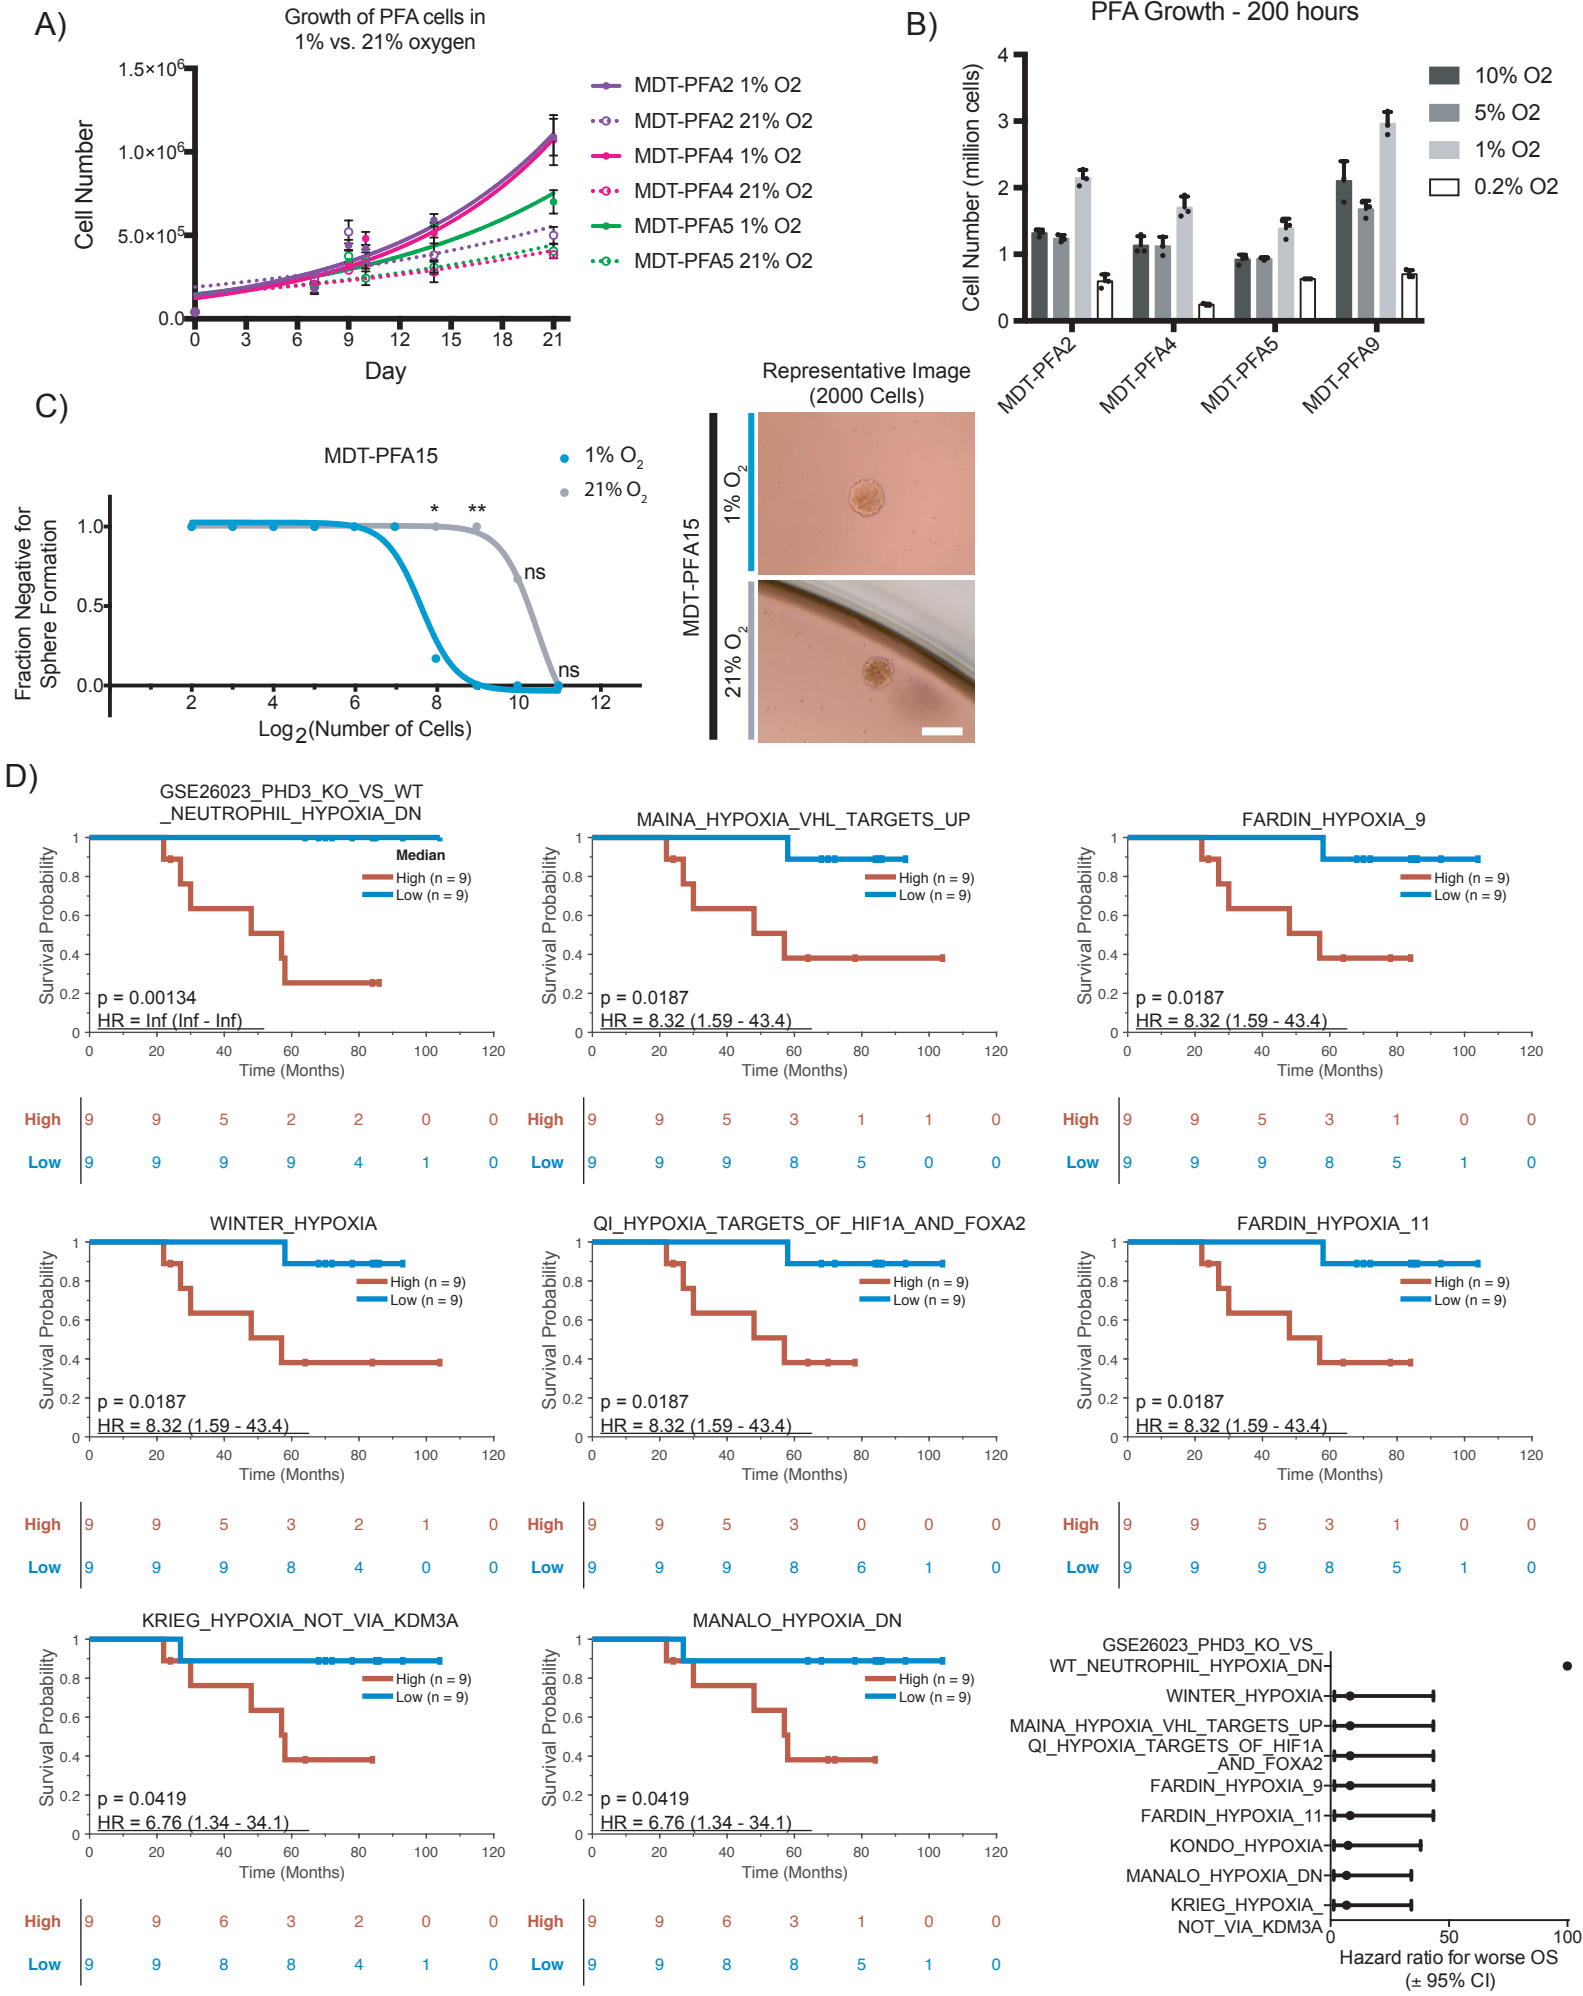

Supplement: NIHMS1591441-supplement-1.pdf [file NIHMS1591441-supplement-1.pdf]

**Figure S5****A)**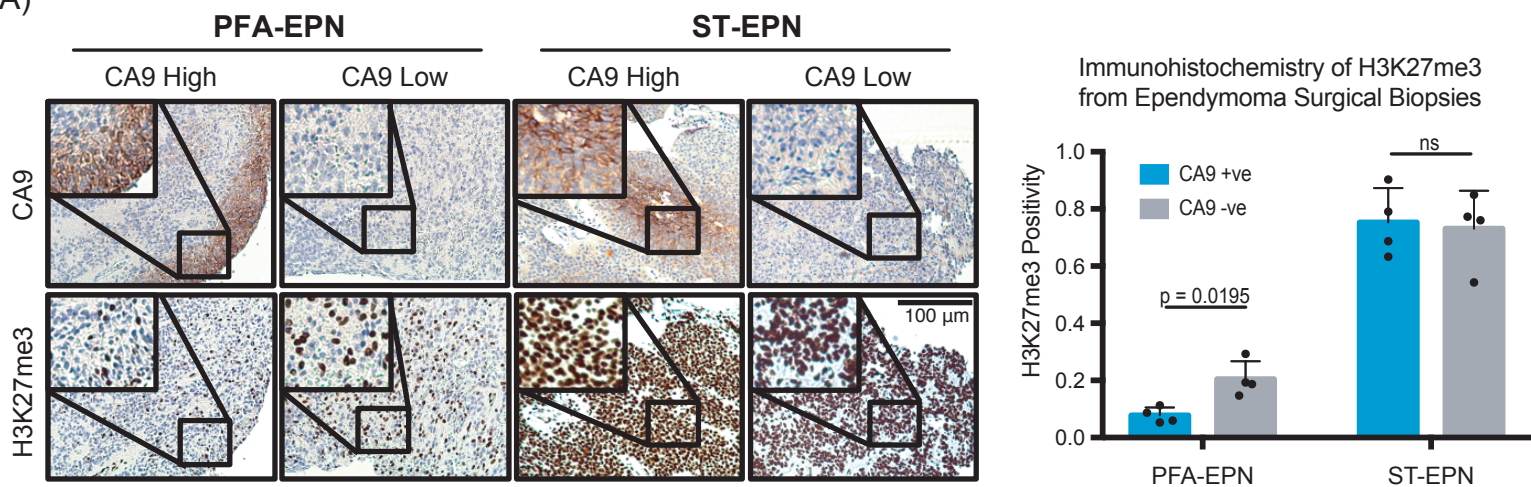**B)**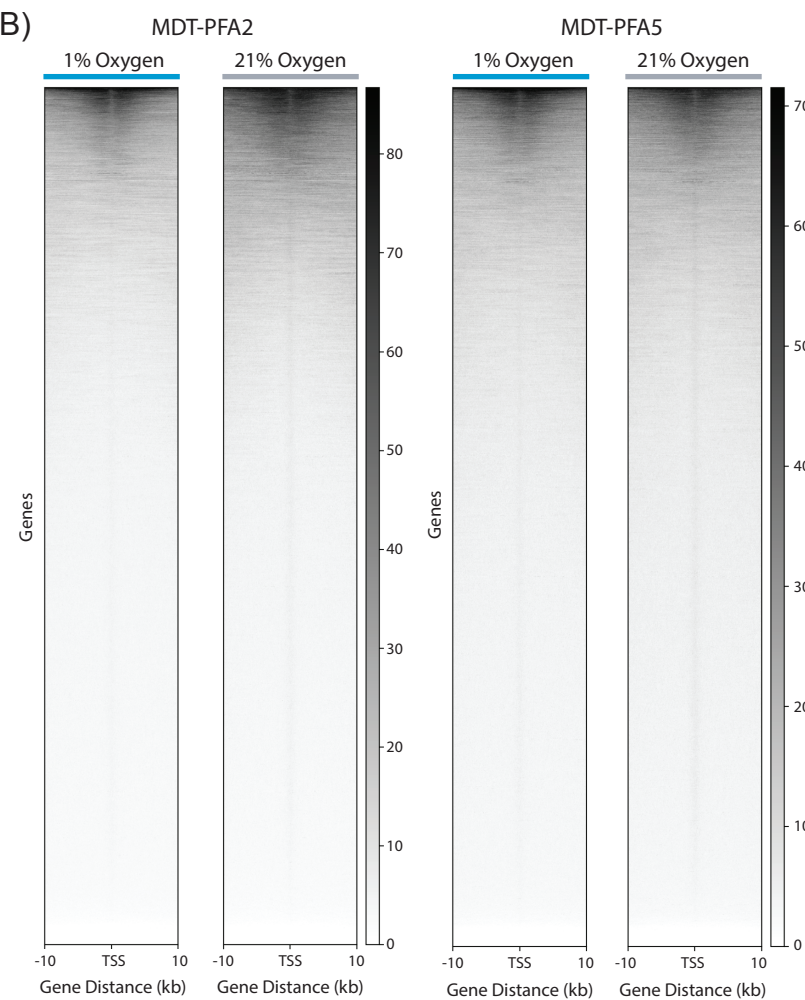**C)**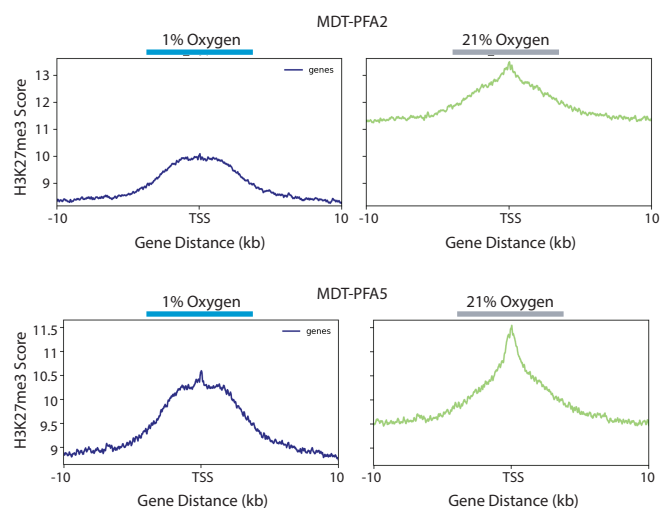**D)**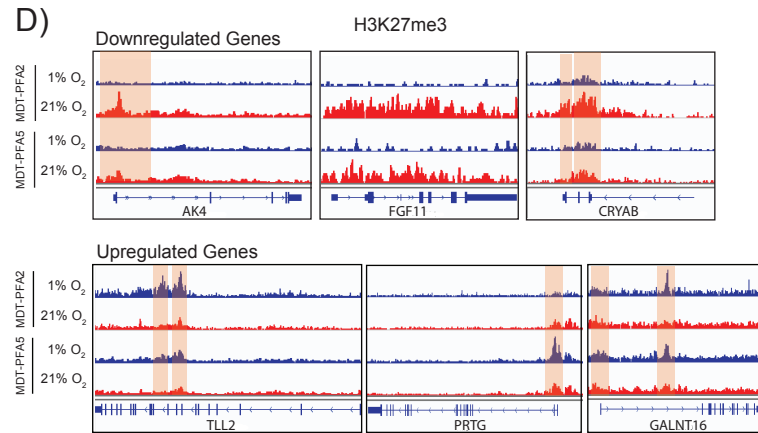

Supplement: NIHMS1591441-supplement-5.pdf [file NIHMS1591441-supplement-5.pdf]

**Figure S6**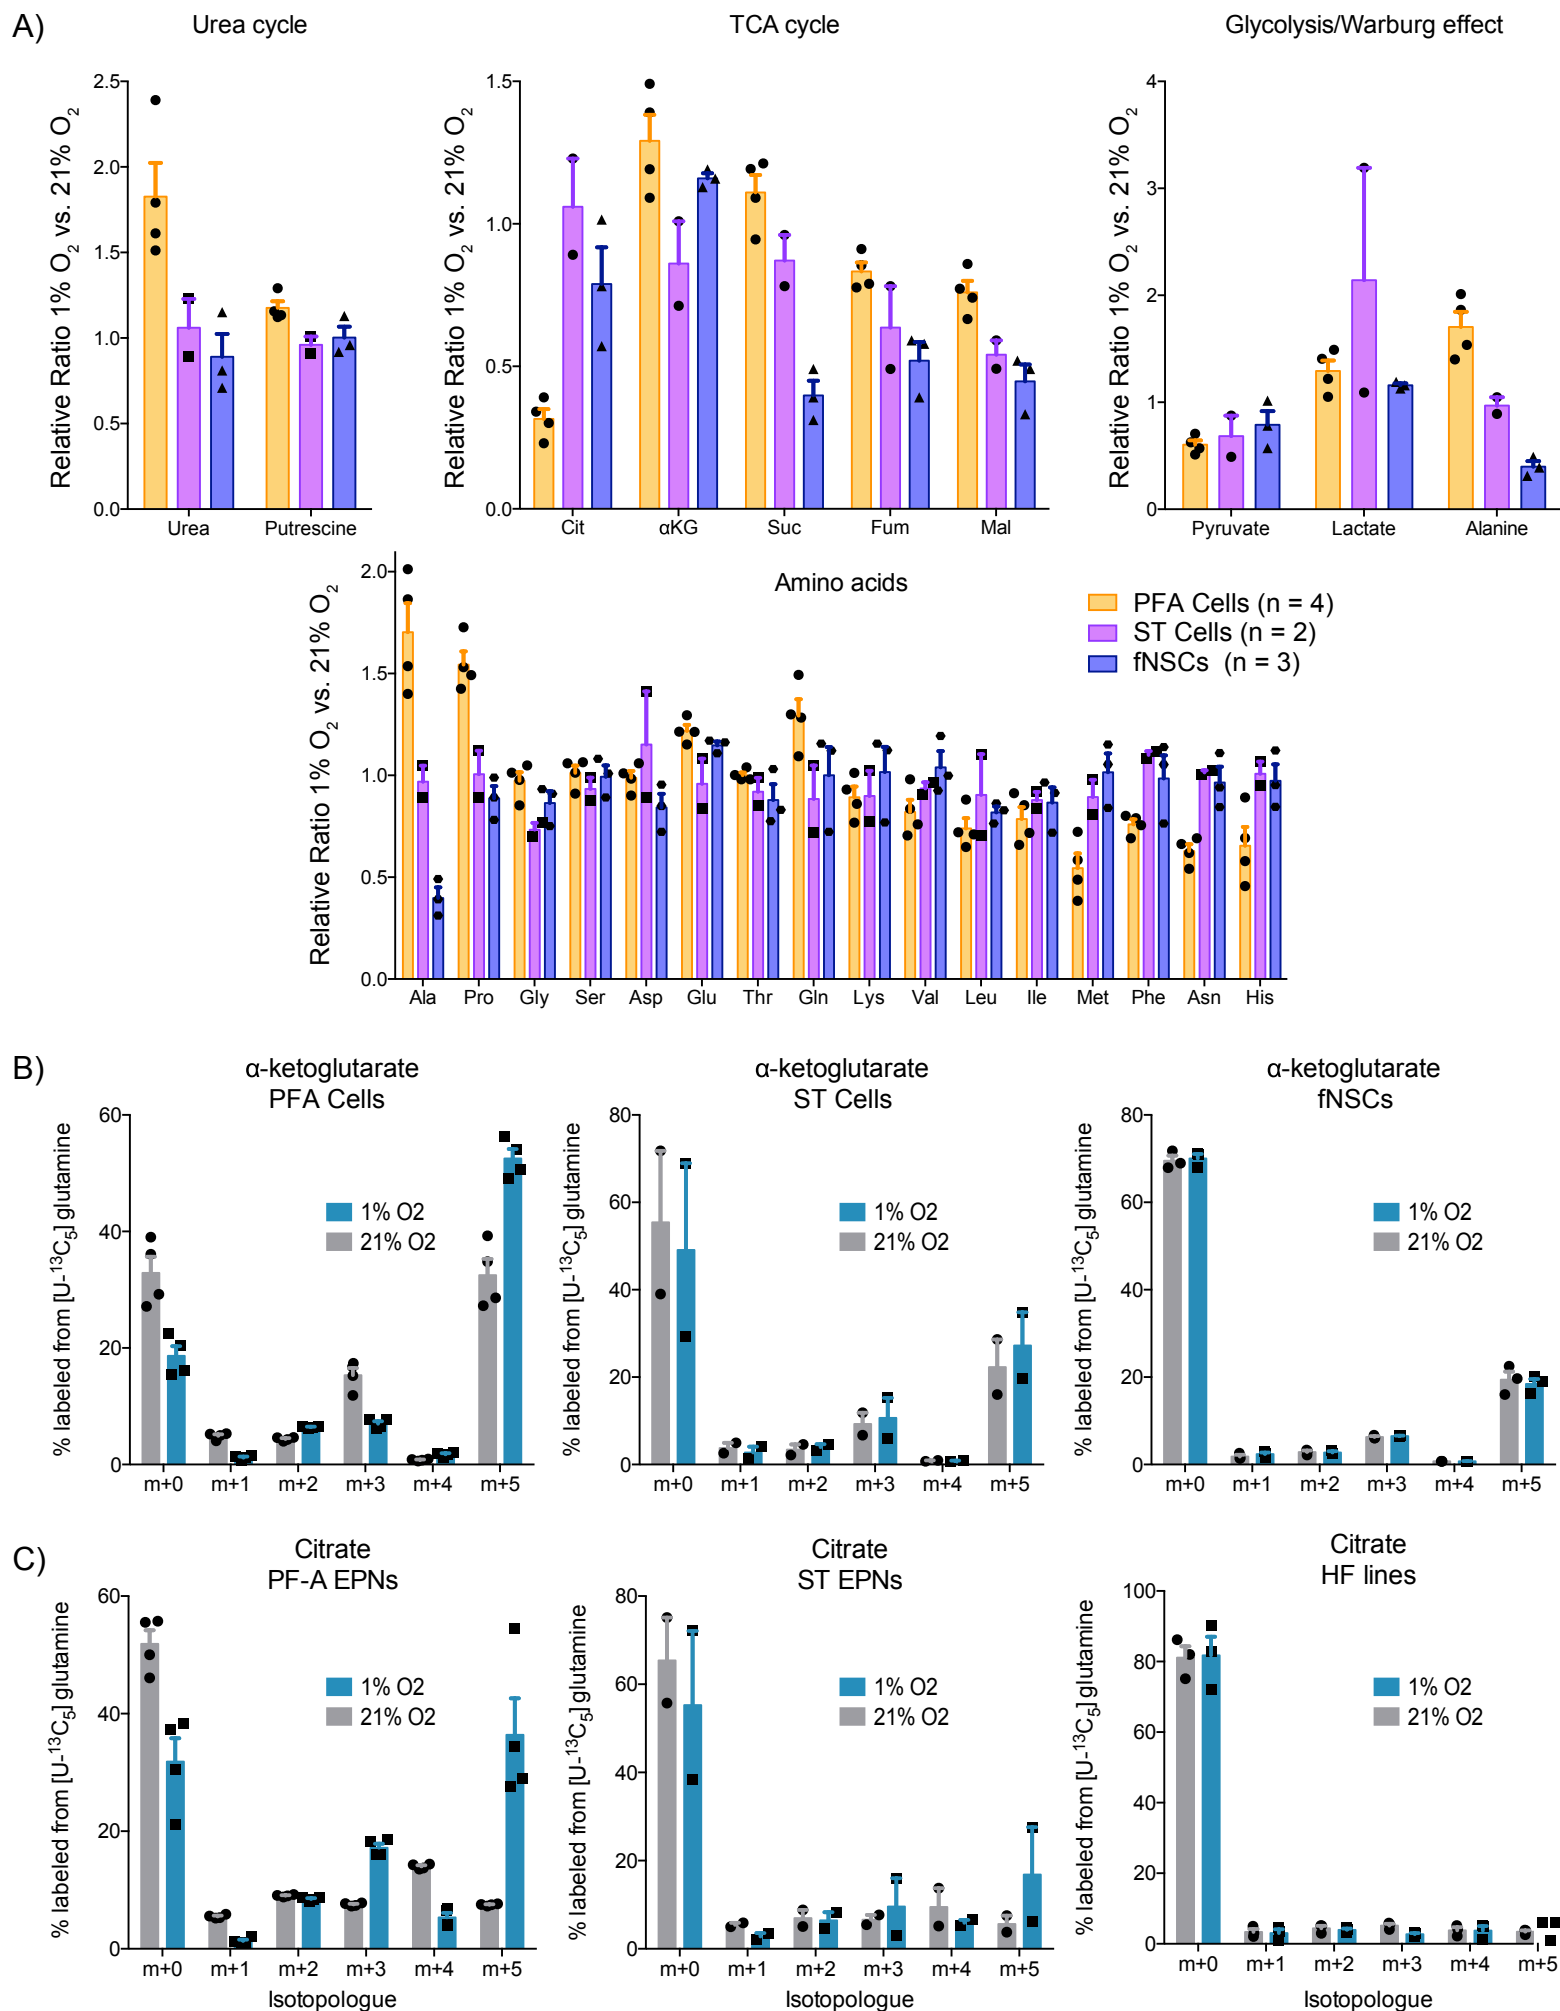

Supplement: NIHMS1591441-supplement-6.pdf [file NIHMS1591441-supplement-6.pdf]

**Figure S7**

A)

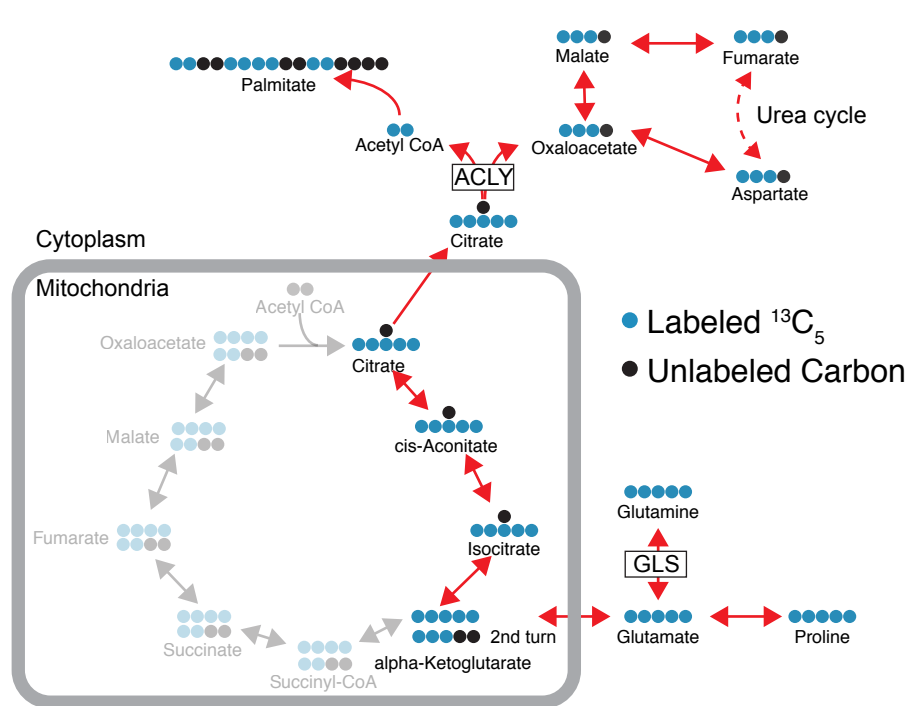

B)

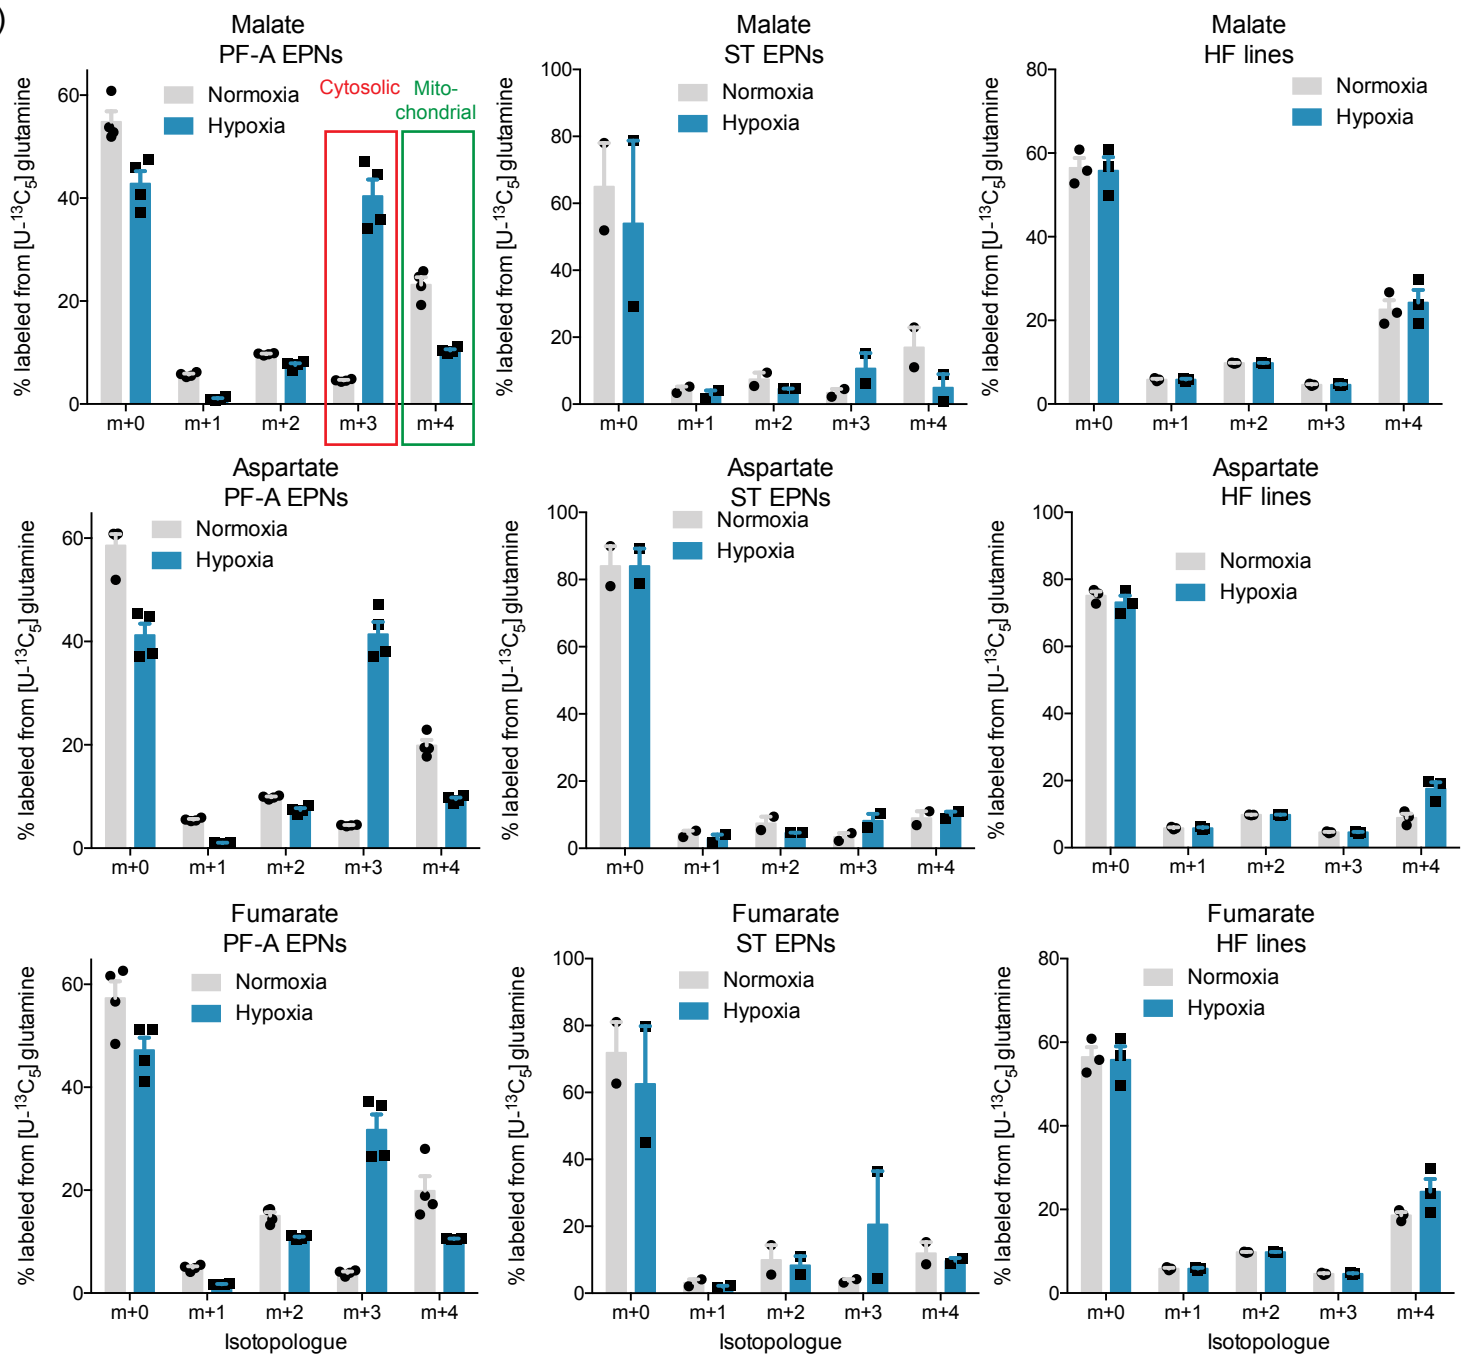

Supplement: NIHMS1591441-supplement-7.pdf [file NIHMS1591441-supplement-7.pdf]
